# Supplementary material for: The Impact of HIV-1 Genetic Diversity on CRISPR-Cas9 Antiviral Activity and Viral Escape
Source: PubMed Central journal article supplement (PMC6466431; doi:10.3390/v11030255), 2019-03-13
Supplement: viruses-11-00255-s001.pdf [file viruses-11-00255-s001.pdf]

|            | target                                                   | mutation |
|------------|----------------------------------------------------------|----------|
| B LAI      | <b>GGAGCAGC</b> AGGAAGCA C <b>TATGGG</b>                 | wt       |
|            | GGAGCAGC AGGAC--- C <b>TATGGG</b>                        | NS/-3    |
|            | GGAGCAGC AGGAAGCA <b>CGTT</b> <b>TATGGG</b>              | +3       |
|            | GGAGCAGC AGGAAGCA <b>A</b> C <b>TATGGG</b>               | +1       |
|            | GGAGCAGC AGGAAGCA <b>CCCC</b> <b>TATGGG</b>              | +3       |
|            | GGAGCAGC AGGAG <b>G</b> -- - <b>---GGG</b>               | NS/-6    |
|            | GGAGCAGC AGGAAGCA <b>CCT</b> <b>TATGGG</b>               | +2       |
|            | GGAGCAGC AGG <b>G</b> AGCA <b>CGTGAC</b> <b>TATGGG</b>   | +5       |
| B JR-CSF   | <b>GGAGCAGC</b> AGGAAGCAC <b>TATGGG</b>                  | wt       |
|            | GGAGCAGC AGGAC---C <b>TATGGG</b>                         | NS/-3    |
|            | GGAGCAGC AGGAAGCAC <b>CC</b> <b>TATGGG</b>               | +2       |
|            | GGAGCAGC ----- <b>-----</b>                              | -21      |
|            | GGAGCAGC AGGAAGCAC <b>CAC</b> <b>TATGGG</b>              | +3       |
|            | GGAGCAGC AGGAAGCA- <b>-----</b>                          | -7       |
|            | GGAGCAGC AGGAAGCAC <b>CCCACC</b> <b>TATGGG</b>           | +6       |
|            | GGAGCAGC AGGAAGCAC <b>TCC</b> <b>TATGGG</b>              | +3       |
|            | GGAGCAG <b>T</b> AGGA <b>TAGGAGCCTT</b> <b>TATGTT</b>    | NS/+6    |
|            | GGAGCAGC AGGAAGCAC <b>-----</b>                          | -12      |
|            | GGAGCA <b>TCC</b> AGGAAGCAC <b>T</b> <b>TATGGG</b>       | NS/+2    |
| B NL4-3    | <b>GGAGCAGCAGGAAGCAC</b> <b>TATGGG</b>                   | wt       |
|            | GGAGCAGCAGGAAGCAC <b>CGGTT</b> <b>TATGGG</b>             | +5       |
|            | GGAGCAGCAGGAAGCAC <b>TC</b> <b>TATGGG</b>                | +2       |
|            | GGAGCAGCAGGAAGCAC <b>TT</b> <b>TATGGG</b>                | +2       |
|            | GGAGCAGCAGGAAGCAC <b>CT</b> <b>TATGGG</b>                | +2       |
|            | GGAGCAGCAGGAAGCAC <b>TTA</b> <b>TATGGG</b>               | +3       |
|            | GGAGCAGCAGGAAGCAC <b>GGG</b> <b>TATGGG</b>               | +3       |
|            | GGAGCAGCAGGAAGCAC <b>FCC</b> <b>TATGGG</b>               | +3       |
|            | GGAGCAGCAGGAAGCAC <b>GGGCAA</b> <b>TATGGG</b>            | +6       |
|            | GGAGCAGCAGGAAGCAC <b>CCT</b> <b>TATGGG</b>               | +3       |
|            | GGAGCAGCAGGAAGCAC <b>CT</b> <b>TATGGG</b>                | +2       |
|            | GGAGCAGCAGGAAGCAC <b>TTCC</b> <b>TATGGG</b>              | +3       |
|            | GGAGCAGCAGGAAGC <b>GGTACCCTCT</b> <b>TATGGG</b>          | NS/+8    |
|            | GGAGCAGCAGGAAGCAC <b>TGTTGAAGTGGGAT</b> <b>TATGGG</b>    | +15      |
|            | GGAGCAGC <b>T</b> ----- <b>-----</b>                     | -20      |
| A 92UG029  | <b>GGA</b> GCA <b>GCT</b> GGAAGCAC <b>TATGGG</b>         | wt       |
|            | GGAGCAG <b>TCCGT</b> ----- <b>--TGGG</b>                 | NS/-7    |
|            | GGAGC <b>CCCGCAA</b> ----- <b>-----</b>                  | NS/-11   |
|            | GGAGCA <b>TCCCGGGAGCT</b> <b>TATGGG</b>                  | NS/+1    |
|            | GGAGCAGCTGGAAGCAC <b>TTCTAACCT</b> <b>TATGGG</b>         | +9       |
| AE 94TH304 | <b>GGA</b> GCA <b>GCA</b> GGAAGCAC <b>TATGGG</b>         | wt       |
|            | GGA GCAGCAGGAAGCAC <b>CCCCCTTCC</b> <b>TATGGG</b>        | +9       |
|            | GG <b>T</b> GCAGCAGGAAGCAC <b>CAA</b> <b>TATGGG</b>      | +3       |
|            | <b>GCTCGCC</b> GCA <b>A</b> GAAGCACA <b>TATGGG</b>       | NS/+2    |
|            | GG <b>G</b> <b>GC</b> ----- <b>TATGGG</b>                | -12      |
|            | <b>GCA</b> GCAGCAGG <b>CGGT</b> -C <b>TATGGG</b>         | NS/-1    |
|            | GGA GCAG <b>TCTGG</b> GGAC <b>TA</b> ----- <b>NS/-12</b> | NS/-12   |
|            | GG <b>G</b> GC <b>A</b> ----- <b>-----</b>               | NS/-24   |

**Figure S1.** Sequence analysis of HIV-1 DNA in dual-gRNA protected Jurkat cells. Cellular DNA was isolated from the infected gGag1+gEnv2 cell cultures that did not show any sign of virus replication at 110 days after infection. The gEnv2-target region of the integrated proviral DNA was amplified by PCR and TA cloned. Multiple TA clones were sequenced (LAI, 7 clones; JR-CSF, 10 clones; NL4-3, 14 clones; 92UG029, 4 clones; 94TH304, 7 clones). Sequences were aligned to the wild-type viral sequence (wt reference sequence shown on top with the protein codon triplets indicated with grey boxes). The PAM sequence is indicated in bold. Mutations are shown in red (-x/+x, x nt deleted/inserted; NS, non-silent amino acid substitution).

**Table S1.** Primers used for sequencing of gRNA target regions

| virus    |         |                        | target region             |                                |                         |
|----------|---------|------------------------|---------------------------|--------------------------------|-------------------------|
| sub-type | isolate | strand                 | gGag1                     | gEnv2                          | gTatRev                 |
| B        | LAI     | sense                  | TAAACACAGTGGGGGGACATCAAG  | GCACCCACCAAGGCAAAGAGAAGAGTGG   | ATATCAAGCAGGACATAACAAGG |
|          |         | antisense              | AATCTGGGTTTCGCATTTTGGACCA | CAACCCCAAATCCCCAGGAGCTGTTGATCC | CTATGATTACTATGGACCACACA |
| B        | JRCFSF  | sense                  | TAAACACAGTGGGGGGACATCAAG  | GTGGCACTGAAGGAAATGAC           | AATGGAGCCAGTAGATCCTAGC  |
|          |         | antisense              | AATCTGGGTTTCGCATTTTGGACCA | ATGCTGTTGCGCCTCAATAG           | CTTCACTCTCATTGCCACTGTC  |
|          |         | sense <sup>a</sup>     |                           | GCACCCACCAAGGCAAAGAGAAGAGTGG   |                         |
|          |         | antisense <sup>a</sup> |                           | CAACCCCAAATCCCCAGGAGCTGTTGATCC |                         |
| B        | NL4-3   | sense                  | TAAACACAGTGGGGGGACATCAAG  | GCACCCACCAAGGCAAAGAGAAGAGTGG   | AATGGAGCCAGTAGATCCTAGC  |
|          |         | antisense              | AATCTGGGTTTCGCATTTTGGACCA | CAACCCCAAATCCCCAGGAGCTGTTGATCC | CTTCACTCTCATTGCCACTGTC  |
| A        | 92UG029 | sense                  | GCCAAAATTACCCTATAGTGAAA   | GCACCCACCAAGGCAAAGAGAAGAGTGG   | TATGGGGATACTTGGGAAGGA   |
|          |         | antisense              | ACAGGGCTATACATCTTACTA     | CAACCCCAAATCCCCAGGAGCTGTTGATCC | TAGTCCATACTAATTGCTA     |
| C        | PHD79B8 | sense                  | TAAACACAGTGGGGGGACATCAAG  | GCACCCACCAAGGCAAAGAGAAGAGTGG   | CATAAATCAATGGACTAG      |
|          |         | antisense              | AATCTGGGTTTCGCATTTTGGACCA | CAACCCCAAATCCCCAGGAGCTGTTGATCC | TAGTCCATACTAATTGCTA     |
| D        | 92UG024 | sense                  | TAAACACAGTGGGGGGACATCAAG  | GCACCCACCAAGGCAAAGAGAAGAGTGG   | ATATCAAGCAGGACATAACAAGG |
|          |         | antisense              | AATCTGGGTTTCGCATTTTGGACCA | CAACCCCAAATCCCCAGGAGCTGTTGATCC | CTATGATTACTATGGACCACACA |
|          |         | sense <sup>a</sup>     |                           |                                | GGAGCCAGTAGATCCTAACC    |
|          |         | antisense <sup>a</sup> |                           |                                | TTCTTCGTCGCTGTCTCC      |
| AE       | 94TH304 | sense                  | TAAACACAGTGGGGGGACATCAAG  | ACCTGGAGGAGGAAATATAAAGGAC      | AACTGTTAGAGGAGCTTAAA    |
|          |         | antisense              | AATCTGGGTTTCGCATTTTGGACCA | TTCCACAGCCAGGACTTTGCTTG        | CTATAGTCCACTACTATTGCT   |
|          |         | sense <sup>a</sup>     |                           |                                | AGATCCTAACCTAGAGCCCT    |
|          |         | antisense <sup>a</sup> |                           |                                | TATTGCTAAGATTAGCGCTACTA |

<sup>a</sup> alternative primer combination used for the amplification of proviral sequences in cultures that did not demonstrate breakthrough virus replication.

**Table S2.** Mismatches between the gRNAs and viral target sequences

| virus   |         | gRNA <sup>a</sup> |                         |                           |                           |
|---------|---------|-------------------|-------------------------|---------------------------|---------------------------|
| subtype | isolate |                   | mismatches <sup>b</sup> | CFD <sup>c</sup>          | RCE <sup>d</sup>          |
| A       | 92UG029 | gGag1             | 1                       | 0.81                      | 1.37                      |
|         |         | gEnv2             | 1                       | 0.60                      | 0.54                      |
|         |         | gTatRev           | 1                       | 0.91                      | 1.02                      |
| C       | PHD79B8 | gGag1             | 2                       | $0.86 \times 0.81 = 0.70$ | $1.54 \times 1.37 = 2.11$ |
|         |         | gEnv2             | 0                       |                           |                           |
|         |         | gTatRev           | 0                       |                           |                           |
| D       | 92UG024 | gGag1             | 0                       |                           |                           |
|         |         | gEnv2             | 1*                      | 0.67                      | 0.12                      |
|         |         | gTatRev           | 0                       |                           |                           |
| AE      | 94TH304 | gGag1             | 1                       | 0.93                      | 0.71                      |
|         |         | gEnv2             | 0                       |                           |                           |
|         |         | gTatRev           | 2                       | $0.91 \times 0.86 = 0.78$ | $1.02 \times \text{nd}$   |

<sup>a</sup> The color indicates the effect of the gRNA on virus replication (Figure 2): orange, no inhibition; yellow, delayed replication.

<sup>b</sup> Number of mismatching nucleotides between gRNA and viral target sequence. \*, mismatch at Cas9 cleavage site.

<sup>c</sup> Cutting frequency determination (CFD) score based on the activity of single-nt mismatching gRNAs, as described by Doench et al. [29](values extracted from Figure 5e and Table S19 in this reference). If there are two mismatches, individual CFD values are multiplied together.

<sup>d</sup> Relative cleavage efficiency (RCE) based on the activity of single-nt mismatching gRNAs targeting 15 EMX1 sites, as described by Hsu et al. [30](values extracted from Figure 2 and Table S5 in this reference). If there are two mismatches, individual RCE values are multiplied together. nd, not determined.
